# Supplementary material for: Rituximab versus natalizumab, fingolimod, and dimethyl fumarate in multiple sclerosis treatment
Source: PubMed Central journal article supplement (PMC7480919; doi:10.1002/acn3.51111), 2020-08-06
Supplement: ACN3-7-1466-s001.pdf [file ACN3-7-1466-s001.pdf]

# Supplemental

## Cohen's D Plots

**Figure S1.** (a) Cohen's D values for effect sizes comparing baseline covariates between NTZ and RTX. (b) Cohen's D values for effect sizes comparing baseline covariates between FTY and RTX. (c) Cohen's D values for effect sizes comparing baseline covariates between DMF and RTX.

Logit [PS] : Propensity scores generated through logistic regression modeled the probability of receiving RTX treatment using the pre-selected covariates of age, sex, disease duration, diagnosis and CEL on baseline MRI

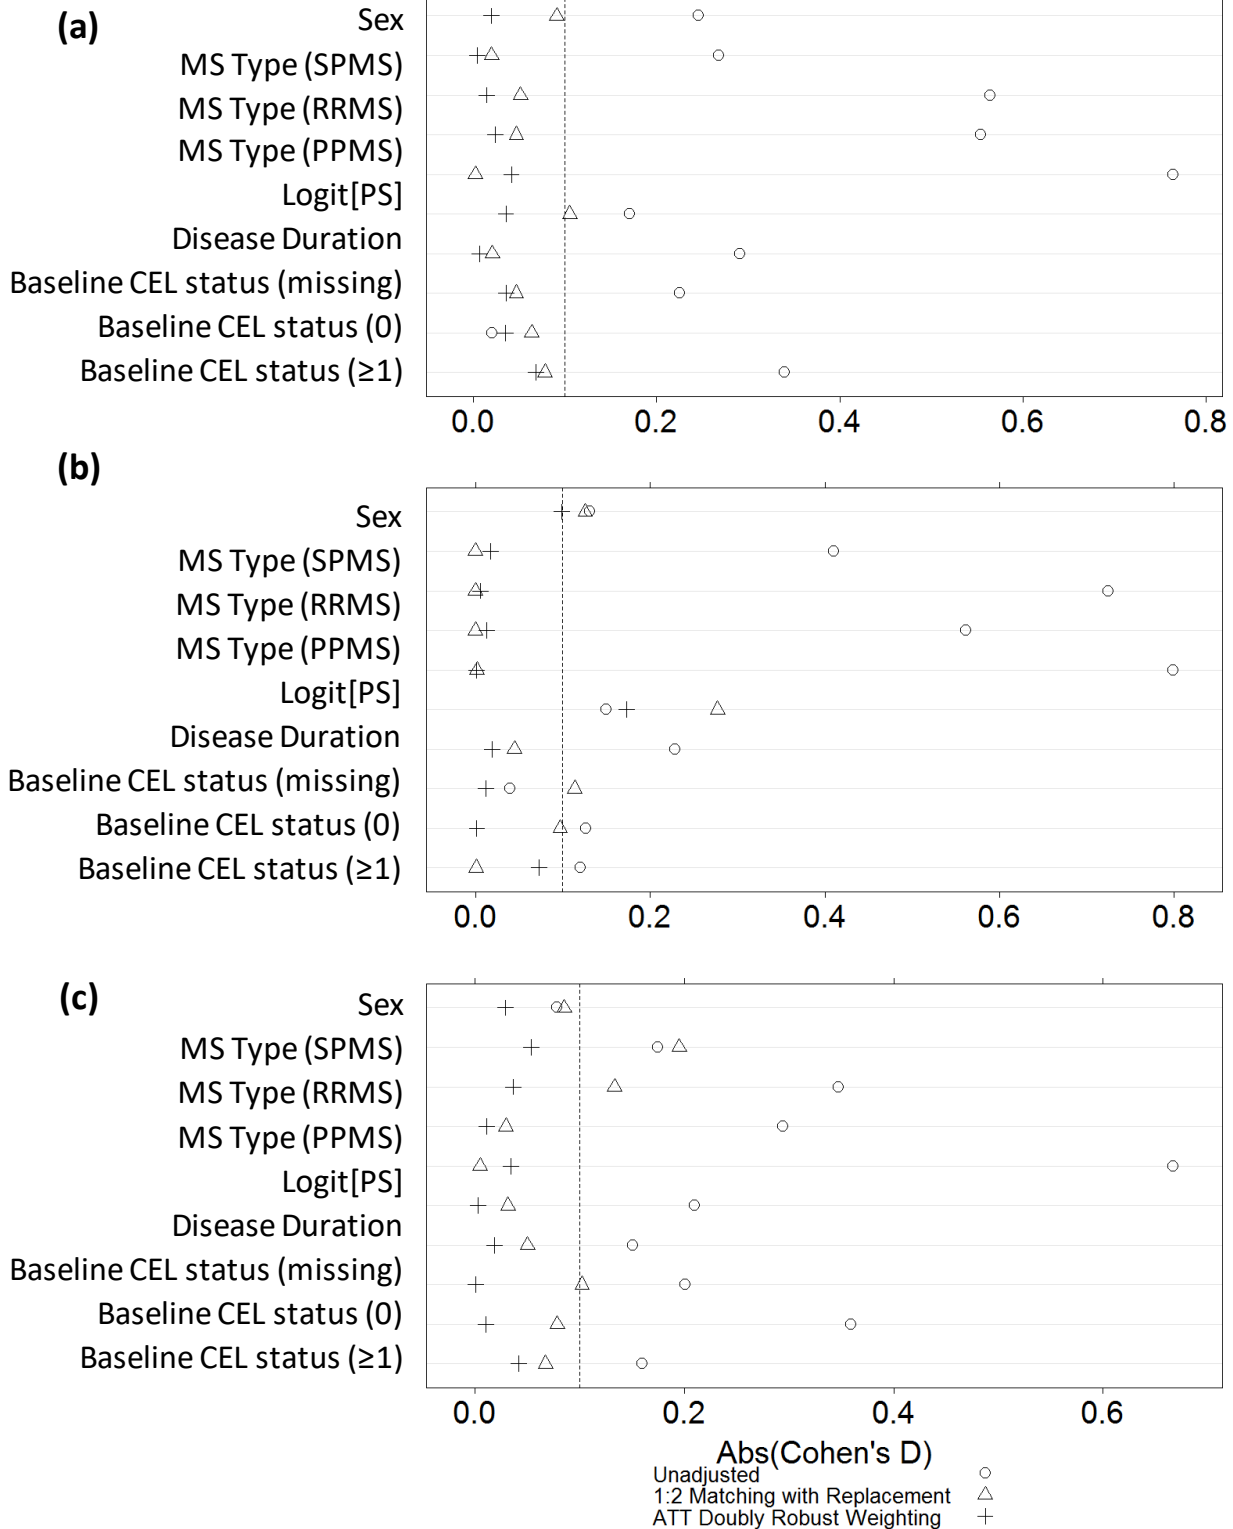

*Relapsing-Remitting Multiple Sclerosis Cohort*

**Table S1.** Baseline characteristics for rituximab (RTX), natalizumab (NTZ), fingolimod (FTY) and dimethyl fumarate (DMF) study cohorts for RRMS patients.

|                                                   | Rituximab<br>(N=113)   | Natalizumab<br>(N=382) |                          | Fingolimod<br>(N=244)  |                          | Dimethyl Fumarate<br>(N=265) |                          |
|---------------------------------------------------|------------------------|------------------------|--------------------------|------------------------|--------------------------|------------------------------|--------------------------|
|                                                   | N or Mean<br>(SD or %) | N or Mean<br>(SD or %) | p-<br>value <sup>^</sup> | N or Mean<br>(SD or %) | p-<br>value <sup>^</sup> | N or Mean<br>(SD or %)       | p-<br>value <sup>^</sup> |
| <b>Disease Duration (Years, SD)</b>               | 11.2 (7.3)             | 10.5 (6.7)             | 0.353                    | 10.4 (6.3)             | 0.291                    | 9.9 (6.6)                    | 0.110                    |
| <b>Age (Years, SD)</b>                            | 41.3 (11.8)            | 37.9 (11.3)            | <b>0.007</b>             | 41.5 (11.2)            | 0.896                    | 43.5 (12.0)                  | 0.096                    |
| <b>Gender - Female</b>                            | 80 (70.8%)             | 298 (78.0%)            | 0.113                    | 178 (73.0%)            | 0.672                    | 192 (72.5%)                  | 0.743                    |
| <b>Previous DMT*</b>                              |                        |                        | <b>&lt;0.001</b>         |                        | <b>&lt;0.001</b>         |                              | <b>&lt;0.001</b>         |
| Interferons                                       | 2 (1.8%)               | 82 (21.5%)             |                          | 35 (14.3%)             |                          | 39 (14.7%)                   |                          |
| Glatiramer acetate                                | 10 (8.9%)              | 140 (36.7%)            |                          | 46 (18.9%)             |                          | 91 (34.3%)                   |                          |
| Natalizumab                                       | 60 (53.1)              | 0 (0.0%)               |                          | 97 (39.8%)             |                          | 48 (18.1%)                   |                          |
| Rituximab                                         | 0 (0.0%)               | 0 (0.0%)               |                          | 1 (0.4%)               |                          | 5 (1.9%)                     |                          |
| Fingolimod                                        | 16 (14.2%)             | 7 (1.8%)               |                          | 0 (0.0%)               |                          | 17 (6.4%)                    |                          |
| Dimethyl fumarate                                 | 0 (0.0%)               | 2 (0.5%)               |                          | 1 (0.4%)               |                          | 0 (0.0%)                     |                          |
| None                                              | 24 (21.2%)             | 141 (36.9%)            |                          | 61 (25.0%)             |                          | 60 (22.6%)                   |                          |
| Other                                             | 1 (0.9%)               | 10 (2.6%)              |                          | 3 (1.2%)               |                          | 4 (1.5%)                     |                          |
| <b>Contrast Enhancement on Baseline MRI</b>       | 31 (30.1%)             | 112 (35.3%)            | 0.330                    | 53 (25.5%)             | 0.388                    | 37 (15.9%)                   | <b>0.003</b>             |
| <b>Disease Burden on Baseline MRI<sup>β</sup></b> |                        |                        | <b>&lt;0.001</b>         |                        | <b>0.009</b>             |                              | <b>&lt;0.001</b>         |
| Mild                                              | 31 (27.1%)             | 177 (46.3%)            |                          | 92 (37.7%)             |                          | 140 (52.8%)                  |                          |
| Moderate                                          | 47 (41.6%)             | 105 (27.5%)            |                          | 70 (27.7%)             |                          | 71 (26.8%)                   |                          |
| Severe                                            | 24 (21.2%)             | 25 (6.5%)              |                          | 37 (15.2%)             |                          | 16 (6.0%)                    |                          |
| Missing                                           | 11 (9.7%)              | 75 (19.6%)             |                          | 45 (18.4%)             |                          | 38 (14.3%)                   |                          |

RRMS: relapsing-remitting multiple sclerosis

<sup>^</sup> In comparison to RTX

\* Within 6 months prior to starting study drug

<sup>β</sup>Disease burden at baseline is defined as mild < 10 T2/Flair Lesions, moderate 10-20 T2/FLAIR lesions, severe > 20 T2/FLAIR lesions"

Bold p-values indicate p>0.05 and are considered statistically significant.

**Table S2.** Unadjusted & adjusted odds ratios for disease activity regardless of discontinuation in a composite effectiveness measure (new T2 lesion, CEL, and/or new clinical relapse) at ≤24 months in RRMS patients.

|                                               | NTZ vs RTX |                             |         | FTY vs RTX |                             |                  | DMF vs RTX |                             |                  |
|-----------------------------------------------|------------|-----------------------------|---------|------------|-----------------------------|------------------|------------|-----------------------------|------------------|
|                                               | N          | Odds Ratio<br>(95 % CI)     | p-value | N          | Odds Ratio<br>(95 % CI)     | p-value          | N          | Odds Ratio<br>(95 % CI)     | p-value          |
| <b>Simple Logistic Regression</b>             | 495        | <b>1.65</b><br>(0.94, 2.88) | 0.078   | 357        | <b>2.98</b><br>(1.69, 5.26) | <b>&lt;0.001</b> | 378        | <b>3.15</b><br>(1.79, 5.53) | <b>&lt;0.001</b> |
| <b>Adjusted Logistic Regression*</b>          | 495        | <b>1.54</b><br>(0.87, 2.73) | 0.135   | 357        | <b>3.36</b><br>(1.87, 6.05) | <b>&lt;0.001</b> | 378        | <b>3.97</b><br>(2.15, 7.31) | <b>&lt;0.001</b> |
| <b>ATT Doubly Robust Weighting Estimator*</b> | 495        | <b>1.58</b><br>(0.90, 2.76) | 0.085   | 357        | <b>3.19</b><br>(1.82, 5.57) | <b>&lt;0.001</b> | 378        | <b>3.56</b><br>(2.03, 6.23) | <b>&lt;0.001</b> |

NTZ: natalizumab; RTX: rituximab; FTY: fingolimod; DMF: dimethyl fumarate; CEL: contrast enhancing lesion; CI: confidence interval; PM: propensity matching; NN: nearest neighbor; RRMS: relapsing-remitting multiple sclerosis

\* controlling for age, disease duration, type of MS, gender, and contrast enhancement on baseline MRI

Bold p-values indicate p>0.05 and are considered statistically significant.

**Table S3.** Unadjusted & adjusted odds ratios for discontinuation for any reason at ≤24 months in RRMS

|                                               | NTZ vs RTX |                             |         | FTY vs RTX |                             |              | DMF vs RTX |                             |                  |
|-----------------------------------------------|------------|-----------------------------|---------|------------|-----------------------------|--------------|------------|-----------------------------|------------------|
|                                               | N          | Odds Ratio<br>(95 % CI)     | p-value | N          | Odds Ratio<br>(95 % CI)     | p-value      | N          | Odds Ratio<br>(95 % CI)     | p-value          |
| <b>Simple Logistic Regression</b>             | 495        | <b>1.57</b><br>(0.96, 2.58) | 0.073   | 357        | <b>1.69</b><br>(1.00, 2.83) | <b>0.049</b> | 378        | <b>2.96</b><br>(1.78, 4.91) | <b>&lt;0.001</b> |
| <b>Adjusted Logistic Regression*</b>          | 495        | <b>1.45</b><br>(0.87, 2.41) | 0.155   | 357        | <b>1.77</b><br>(1.05, 2.99) | <b>0.033</b> | 378        | <b>3.45</b><br>(2.02, 5.89) | <b>&lt;0.001</b> |
| <b>ATT Doubly Robust Weighting Estimator*</b> | 495        | <b>1.47</b><br>(0.89, 2.44) | 0.118   | 357        | <b>1.73</b><br>(1.04, 2.90) | <b>0.026</b> | 378        | <b>3.10</b><br>(1.68, 5.69) | <b>&lt;0.001</b> |

NTZ: natalizumab; RTX: rituximab; FTY: fingolimod; DMF: dimethyl fumarate; CEL: contrast enhancing lesion; CI: confidence interval; PM: propensity matching; NN: nearest neighbor; RRMS: relapsing-remitting multiple sclerosis

\* controlling for age, disease duration, type of MS, gender, and contrast enhancement on baseline MRI

Bold p-values indicate p>0.05 and are considered statistically significant.

Odds of Experiencing Disease Activity between 6-24 Months of Treatment

All Subjects on Therapy >6 Months Included in Analysis

**Table S4.** Unadjusted & adjusted odds ratios for disease activity regardless of discontinuation in a composite effectiveness measure (new T2 lesion, CEL, and/or new clinical relapse) between 6-24 Months of treatment.

|                                               | NTZ vs RTX           |                             |              | FTY vs RTX           |                             |                  | DMF vs RTX           |                             |                  |
|-----------------------------------------------|----------------------|-----------------------------|--------------|----------------------|-----------------------------|------------------|----------------------|-----------------------------|------------------|
|                                               | N                    | Odds Ratio<br>(95 % CI)     | p-value      | N                    | Odds Ratio<br>(95 % CI)     | p-value          | N                    | Odds Ratio<br>(95 % CI)     | p-value          |
| <b>Simple Logistic Regression</b>             | 599                  | <b>2.28</b><br>(1.31, 3.98) | <b>0.004</b> | 416                  | <b>3.61</b><br>(2.03, 6.43) | <b>&lt;0.001</b> | 462                  | <b>2.79</b><br>(1.57, 4.95) | <b>&lt;0.001</b> |
| <b>Adjusted Logistic Regression*</b>          | 599                  | <b>2.27</b><br>(1.27, 4.07) | <b>0.006</b> | 416                  | <b>4.07</b><br>(2.05, 8.06) | <b>&lt;0.001</b> | 462                  | <b>3.13</b><br>(1.63, 5.99) | <b>0.001</b>     |
| <b>PM 1:2 NN with replacement*</b>            | 543<br>374<br>unique | <b>2.31</b><br>(1.22, 4.39) | <b>0.010</b> | 543<br>338<br>unique | <b>3.48</b><br>(1.65, 7.36) | <b>0.001</b>     | 543<br>345<br>unique | <b>2.56</b><br>(1.32, 4.99) | <b>0.006</b>     |
| <b>ATT Doubly Robust Weighting Estimator*</b> | 599                  | <b>2.21</b><br>(1.20, 4.06) | <b>0.007</b> | 416                  | <b>4.25</b><br>(2.16, 8.36) | <b>&lt;0.001</b> | 462                  | <b>3.10</b><br>(1.68, 5.69) | <b>&lt;0.001</b> |

NTZ: natalizumab; RTX: rituximab; FTY: fingolimod; DMF: dimethyl fumarate; CEL: contrast enhancing lesion; CI: confidence interval; PM: propensity matching; NN: nearest neighbor

\* controlling for age, disease duration, type of MS, gender, and contrast enhancement on baseline MRI

Bold p-values indicate p>0.05 and are considered statistically significant.

Time to Event Analysis of Composite Effectiveness Measure for Entire Cohort

**Table S5.** Time to event analyses for composite disease activity measure.

| Model Type (NTZ vs RTX)       | Adjustment | Hazard Ratio (95% CI) | p-value          |
|-------------------------------|------------|-----------------------|------------------|
| State Transition (Population) | None       | 1.58 (1.05, 2.40)     | <b>0.030</b>     |
| State Transition (Population) | Full*      | 1.49 (0.96, 2.30)     | 0.077            |
|                               |            |                       |                  |
| Model Type (FTY vs RTX)       | Adjustment | Hazard Ratio (95% CI) | p-value          |
| State Transition (Population) | None       | 2.81 (1.86, 4.27)     | <b>&lt;0.001</b> |
| State Transition (Population) | Full*      | 3.18 (1.99, 5.07)     | <b>&lt;0.001</b> |
|                               |            |                       |                  |
| Model Type (DMF vs RTX)       | Adjustment | Hazard Ratio (95% CI) | p value          |
| State Transition (Population) | None       | 2.97 (1.98, 4.45)     | <b>&lt;0.001</b> |
| State Transition (Population) | Full*      | 3.38 (2.20, 5.20)     | <b>&lt;0.001</b> |

\*controlling for age, disease duration, type of MS, gender, and contrast enhancement on baseline MRI

Bold p-values indicate p>0.05 and are considered statistically significant.

Discontinuation for Any Reason Other Than Insurance

**Table S6.** Unadjusted & adjusted odds ratios for discontinuation for any reason other than insurance at ≤24 months.

|                                               | NTZ vs RTX           |                             |                  | FTY vs RTX           |                             |                  | DMF vs RTX           |                             |                  |
|-----------------------------------------------|----------------------|-----------------------------|------------------|----------------------|-----------------------------|------------------|----------------------|-----------------------------|------------------|
|                                               | N                    | Odds Ratio<br>(95 % CI)     | p-value          | N                    | Odds Ratio<br>(95 % CI)     | p-value          | N                    | Odds Ratio<br>(95 % CI)     | p-value          |
| <b>Simple Logistic Regression</b>             | 633                  | <b>2.25</b><br>(1.43, 3.55) | <b>&lt;0.001</b> | 453                  | <b>2.44</b><br>(1.51, 3.94) | <b>&lt;0.001</b> | 524                  | <b>4.09</b><br>(2.58, 6.48) | <b>&lt;0.001</b> |
| <b>Adjusted Logistic Regression*</b>          | 633                  | <b>2.33</b><br>(1.43, 3.79) | <b>0.001</b>     | 453                  | <b>3.12</b><br>(1.84, 5.31) | <b>&lt;0.001</b> | 524                  | <b>5.65</b><br>(3.40, 9.38) | <b>&lt;0.001</b> |
| <b>PM 1:2 NN with replacement*</b>            | 546<br>372<br>Unique | <b>2.34</b><br>(1.33, 4.11) | <b>0.003</b>     | 546<br>347<br>unique | <b>3.48</b><br>(1.80, 6.76) | <b>&lt;0.001</b> | 546<br>371<br>unique | <b>5.15</b><br>(2.96, 8.95) | <b>&lt;0.001</b> |
| <b>ATT Doubly Robust Weighting Estimator*</b> | 633                  | <b>2.36</b><br>(1.44, 3.88) | <b>&lt;0.001</b> | 453                  | <b>2.97</b><br>(1.71, 5.17) | <b>&lt;0.001</b> | 524                  | <b>5.22</b><br>(3.27, 8.34) | <b>&lt;0.001</b> |

NTZ: natalizumab; RTX: rituximab; FTY: fingolimod; DMF: dimethyl fumarate; CI: confidence interval; PM: propensity matching; NN: nearest neighbor.

\* controlling for age, disease duration, type of MS, gender, and contrast enhancement on baseline MRI

Bold p-values indicate p>0.05 and are considered statistically significant.

**Figure S2.** Kaplan-Meier failure curves demonstrating cumulative probability of discontinuation for any reason other than insurance over time.

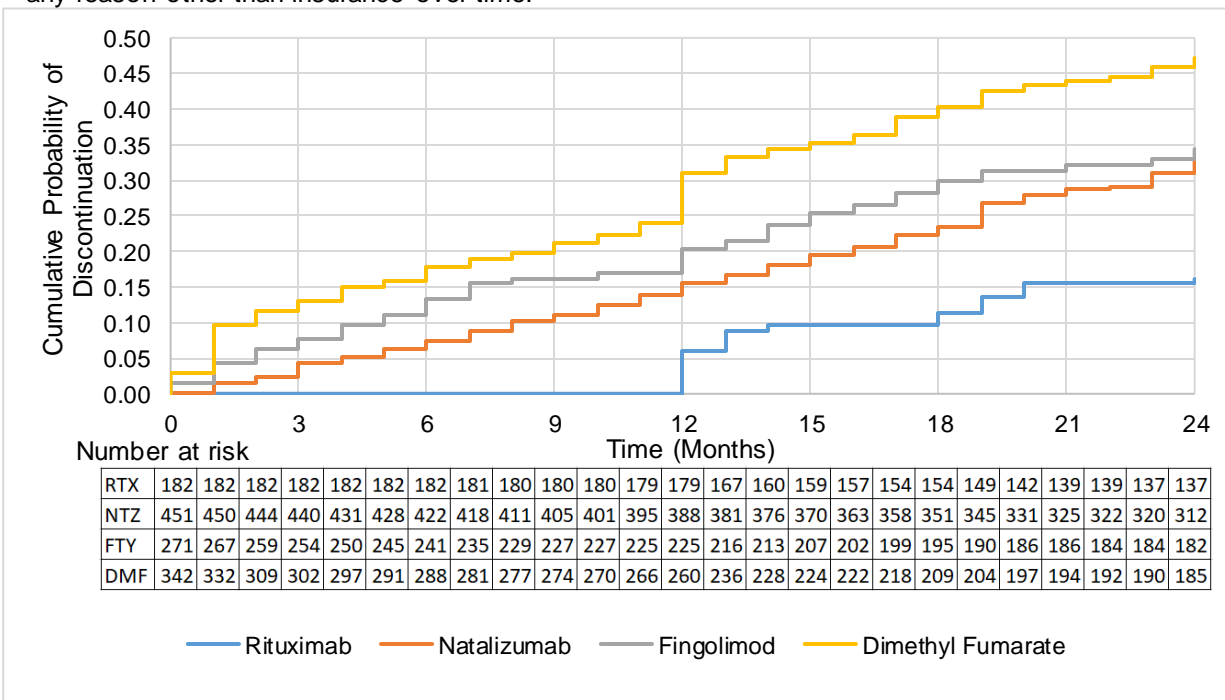

Discontinuation Due to Adverse Events

**Table S7.** Unadjusted & adjusted odds ratios for discontinuation due to adverse events at ≤24 months.

|                                               | NTZ vs RTX           |                              |         | FTY vs RTX           |                             |              | DMF vs RTX           |                              |                  |
|-----------------------------------------------|----------------------|------------------------------|---------|----------------------|-----------------------------|--------------|----------------------|------------------------------|------------------|
|                                               | N                    | Odds Ratio<br>(95 % CI)      | p-value | N                    | Odds Ratio<br>(95 % CI)     | p-value      | N                    | Odds Ratio<br>(95 % CI)      | p-value          |
| <b>Simple Logistic Regression</b>             | 633                  | <b>1.01</b><br>(0.51, 2.02)  | 0.979   | 453                  | <b>2.90</b><br>(1.49, 5.64) | <b>0.002</b> | 524                  | <b>4.47</b><br>(2.36, 8.44)  | <b>&lt;0.001</b> |
| <b>Adjusted Logistic Regression*</b>          | 633                  | <b>0.92</b><br>(0.44, 1.90)  | 0.819   | 453                  | <b>3.21</b><br>(1.63, 6.33) | <b>0.001</b> | 524                  | <b>6.09</b><br>(3.09, 11.99) | <b>&lt;0.001</b> |
| <b>PM 1:2 NN with replacement*</b>            | 546<br>372<br>Unique | <b>0.91</b><br>(0.40, 2.10)  | 0.827   | 546<br>347<br>unique | <b>3.55</b><br>(1.62, 7.78) | <b>0.002</b> | 546<br>371<br>unique | <b>3.31</b><br>(1.63, 6.74)  | <b>0.001</b>     |
| <b>ATT Doubly Robust Weighting Estimator*</b> | 633                  | <b>0.793</b><br>(0.39, 1.63) | 0.545   | 453                  | <b>2.65</b><br>(1.30, 5.37) | <b>0.004</b> | 524                  | <b>4.98</b><br>(2.57, 9.65)  | <b>&lt;0.001</b> |

NTZ: natalizumab; RTX: rituximab; FTY: fingolimod; DMF: dimethyl fumarate; CI: confidence interval; PM: propensity matching; NN: nearest neighbor.

\* controlling for age, disease duration, type of MS, gender, and contrast enhancement on baseline MRI

Bold p-values indicate p>0.05 and are considered statistically significant.

**Figure S3.** Kaplan-Meier failure curves demonstrating cumulative probability of discontinuation due to adverse events

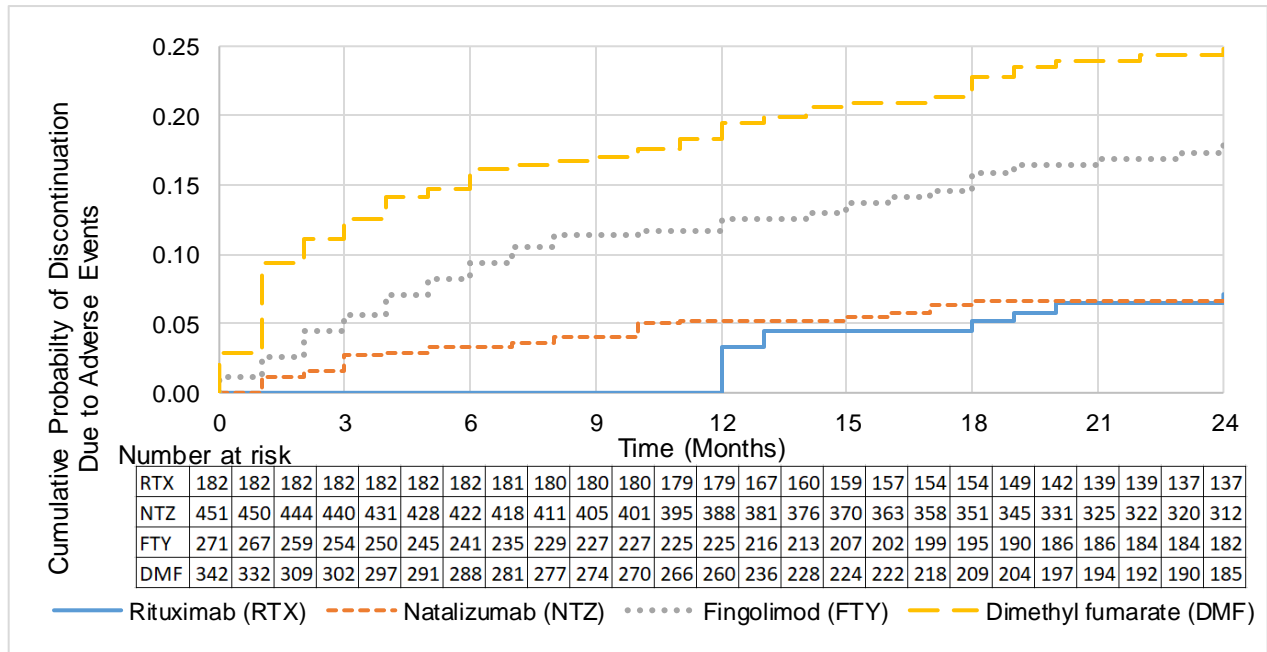

**Table S8.** Percentage of all patients on indicated therapy who experienced adverse events leading to discontinuation.

| Adverse Event                        | Rituximab<br>N=182 |      | Natalizumab<br>N=451 |                | Fingolimod<br>N=271 |      | Dimethyl fumarate<br>N=342 |       |
|--------------------------------------|--------------------|------|----------------------|----------------|---------------------|------|----------------------------|-------|
|                                      | N                  | %    | N                    | %              | N                   | %    | N                          | %     |
| Infections                           | 5                  | 2.7% | 3                    | 0.7%           | 7                   | 2.6% | 4                          | 1.2%  |
| Neutropenia                          | 3                  | 1.6% | -                    | -              | -                   | -    | -                          | -     |
| Shortness of Breath (NAb+)           | 2                  | 1.1% | 2<br>(2)             | 0.4%<br>(0.4%) | 3                   | 1.1% | -                          | -     |
| Worsening Sarcoidosis                | 1                  | 0.5% | -                    | -              | -                   | -    | -                          | -     |
| Low Platelet Count                   | 1                  | 0.5% | -                    | -              | -                   | -    | -                          | -     |
| GI Issues                            | --                 | -    | 4                    | 0.9%           | 11                  | 4.1% | 66                         | 19.3% |
| Flushing/Rash/Hot flashes (NAb+)     | -                  | -    | 14<br>12             | 3.1%<br>(2.7%) | -                   | -    | 25                         | 7.3%  |
| Headaches                            | -                  | -    | 5                    | 1.1%           | 8                   | 3.0% | 1                          | 0.3%  |
| Fatigue                              | -                  | -    | 6                    | 1.3%           | -                   | -    | -                          | -     |
| Lymphopenia                          | -                  | -    | -                    | -              | 7                   | 2.6% | 6                          | 1.8%  |
| Elevated LFTs                        | -                  | -    | 3                    | 0.7%           | 6                   | 2.2% | 1                          | 0.3%  |
| Psychiatric disorders                | -                  | -    | 4                    | 0.9%           | 2                   | 4.3% | 1                          | 0.3%  |
| Weight Gain                          | -                  | -    | 1                    | 0.2%           | 1                   | 0.4% | 1                          | 0.3%  |
| Hypotension                          | -                  | -    | 1                    | 0.2%           | -                   | -    | -                          | -     |
| Ovarian Cyst                         | -                  | -    | 1                    | 0.2%           | -                   | -    | -                          | -     |
| Arrhythmia                           | -                  | -    | -                    | -              | 4                   | 1.5% | -                          | -     |
| Hair Loss                            | -                  | -    | -                    | -              | 2                   | 0.7% | 2                          | 0.6%  |
| Bradycardia                          | -                  | -    | -                    | -              | 3                   | 1.1% | -                          | -     |
| Hypertension                         | -                  | -    | -                    | -              | 3                   | 1.1% | -                          | -     |
| Tachycardia                          | -                  | -    | -                    | -              | 3                   | 1.1% | -                          | -     |
| Muscle Spasms/weakness               | -                  | -    | 1                    | 0.2%           | 1                   | 0.4% | 3                          | 0.9%  |
| Taste & vision changes               | -                  | -    | -                    | -              | 2                   | 0.7% | 1                          | 0.3%  |
| Reported pain (Other than Abdominal) | -                  | -    | -                    | -              | 1                   | 0.4% | 2                          | 0.6%  |
| Alveolar Hemorrhage                  | -                  | -    | -                    | -              | 1                   | 0.4% | -                          | -     |
| Palpitations                         | -                  | -    | -                    | -              | 1                   | 0.4% | -                          | -     |
| Pancytopenia                         | -                  | -    | -                    | -              | 1                   | 0.4% | -                          | -     |
| Seizures                             | -                  | -    | -                    | -              | 1                   | 0.4% | -                          | -     |

NAb+: neutralizing antibody positive; GI: gastrointestinal; LFTs: liver function test.

Note: Discontinuation occurred in 46 RTX, 147 NTZ, 93 FTY, and 161 DMF patients.

Discontinuations due to AEs occurred in 12 RTX, 30 NTZ, 46 FTY, and 82 DMF patients.
